# Supplementary material for: Prognostic value of baseline interleukin 6 levels in liver decompensation and survival in HCC patients undergoing radioembolization
Source: PubMed Central journal article supplement (PMC8172845; doi:10.1186/s13550-021-00791-w), 2021-06-02
Supplement: 13550_2021_791_MOESM1_ESM.pdf [file 13550_2021_791_MOESM1_ESM.pdf]

**A**Strata + IL6=low + IL6=high

Progression-free survival probability

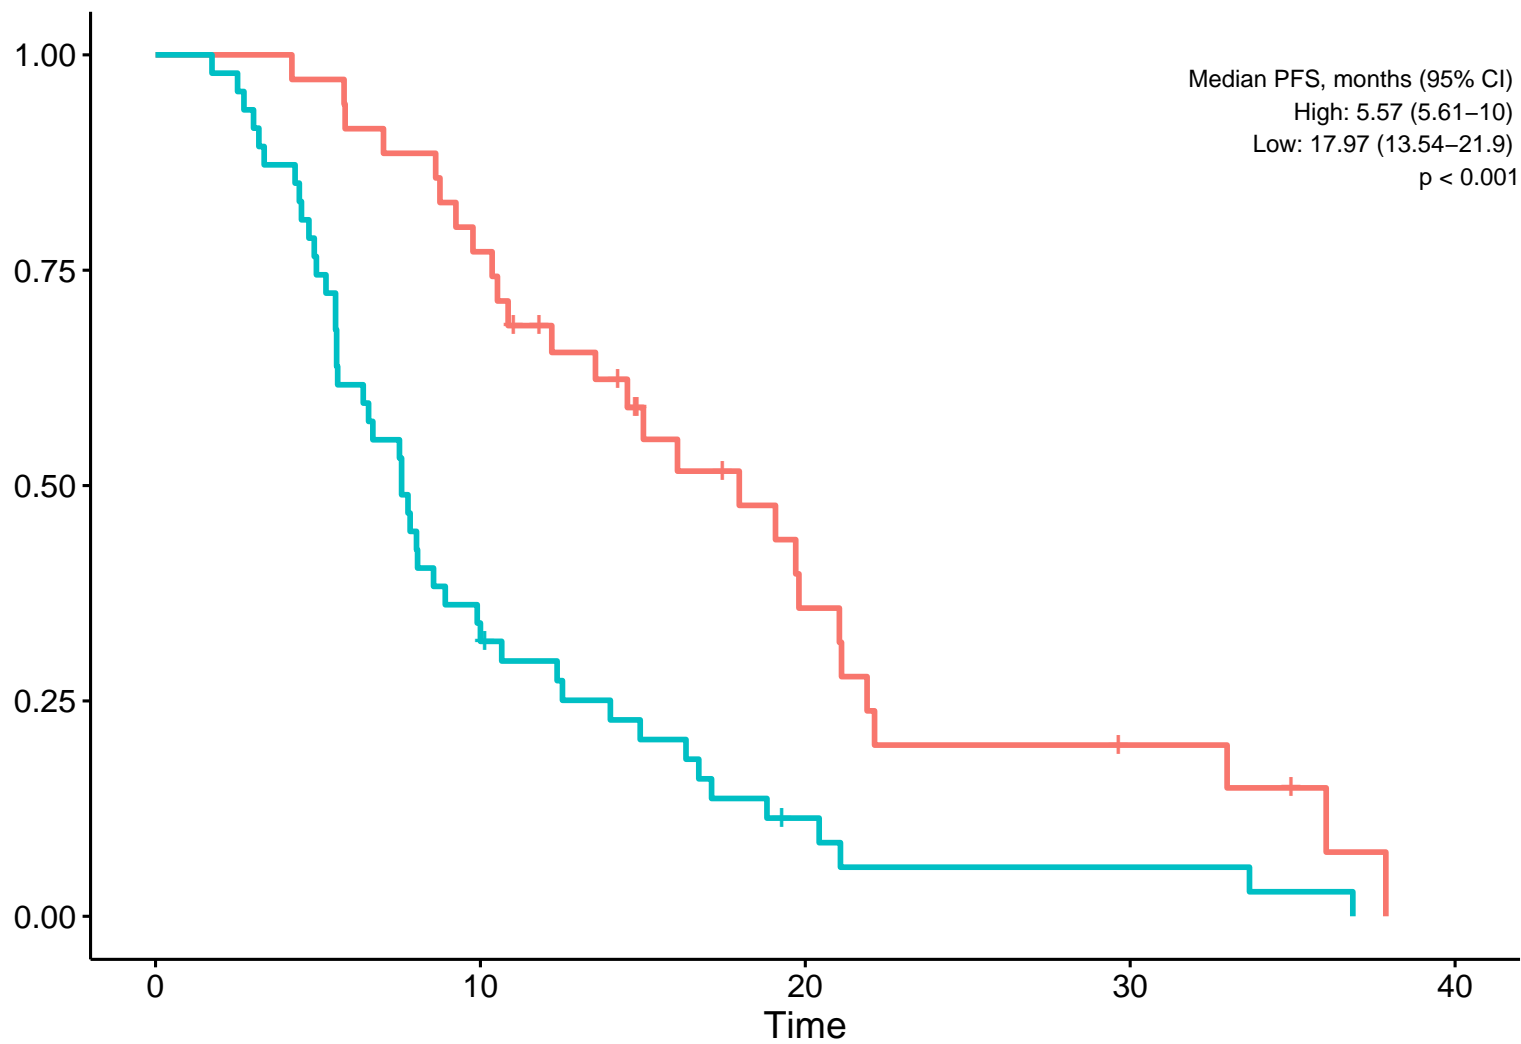

Number at risk

Strata

IL6=low

35

27

9

4

0

IL6=high

47

16

4

2

0

Time

**B**Strata + IL8=low + IL8=high

Progression-free survival probability

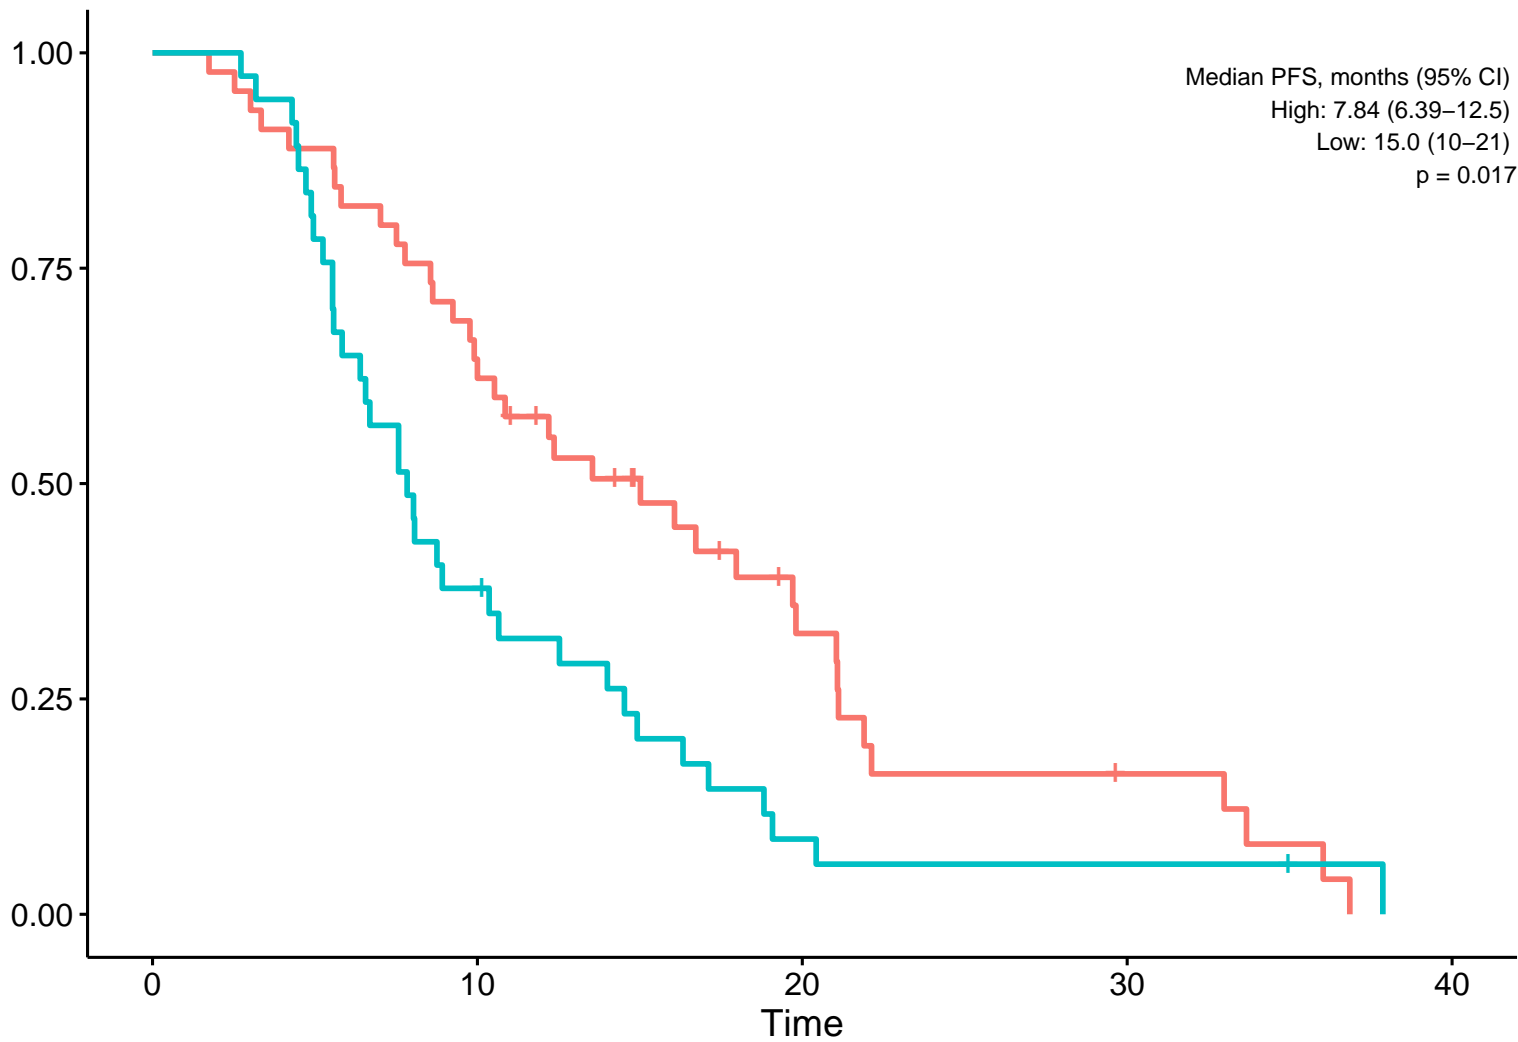

Number at risk

Strata

IL8=low  
IL8=high

| Time (months) | IL8=low | IL8=high |
|---------------|---------|----------|
| 0             | 45      | 37       |
| 10            | 29      | 14       |
| 20            | 10      | 3        |
| 30            | 4       | 2        |
| 40            | 0       | 0        |
