# Supplementary material for: Prognostic value of baseline interleukin 6 levels in liver decompensation and survival in HCC patients undergoing radioembolization
Source: PubMed Central journal article supplement (PMC8172845; doi:10.1186/s13550-021-00791-w), 2021-06-02

**Supplementary figure 2a.**  
**Multivariable analysis using IL6 as**  
**continuous variable**

**Multivariable Cox Regression**  
**Hazard ratio**

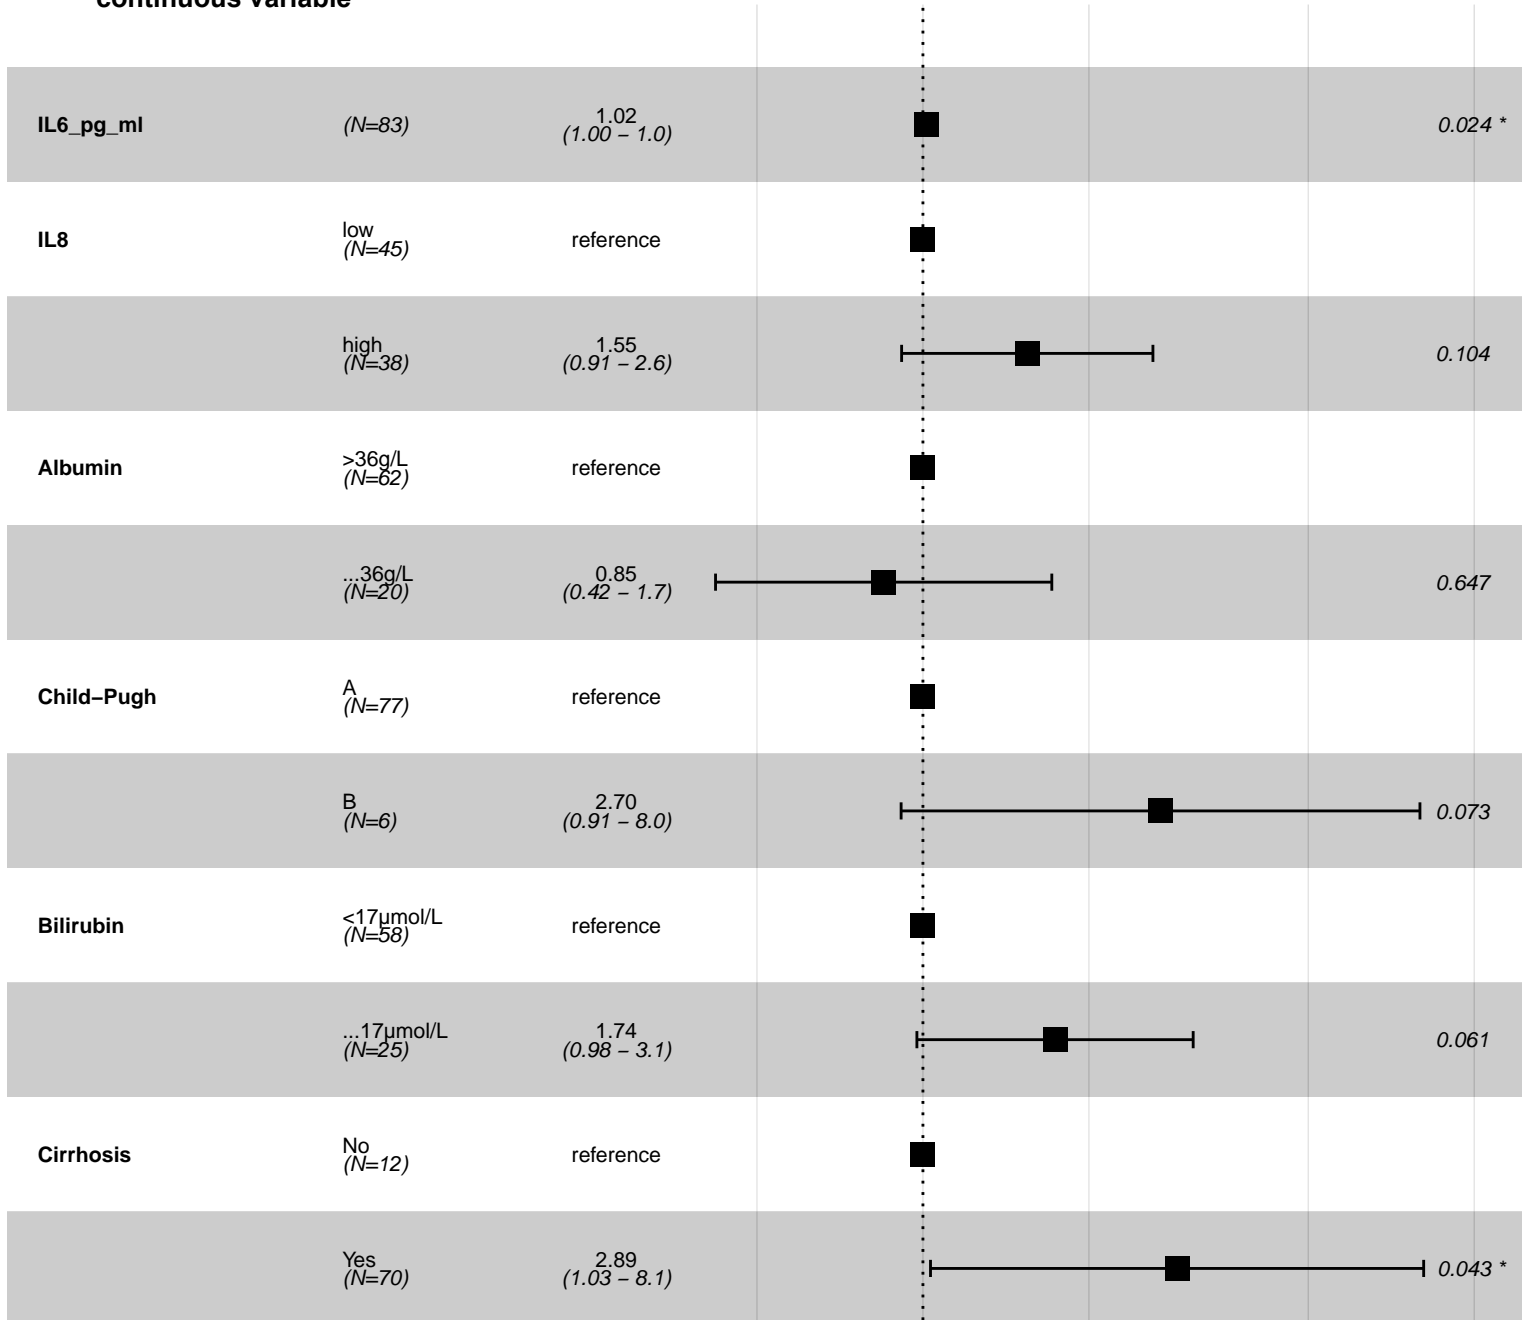

# Events: 71; Global p-value (Log-Rank): 0.00088952

AIC: 482.79; Concordance Index: 0.68

0.5

1

2

5

10

**Supplementary figure 2b.**  
**Multivariable analysis using IL8 as**  
**continuous variable**

**Multivariable Cox Regression**  
**Hazard ratio**

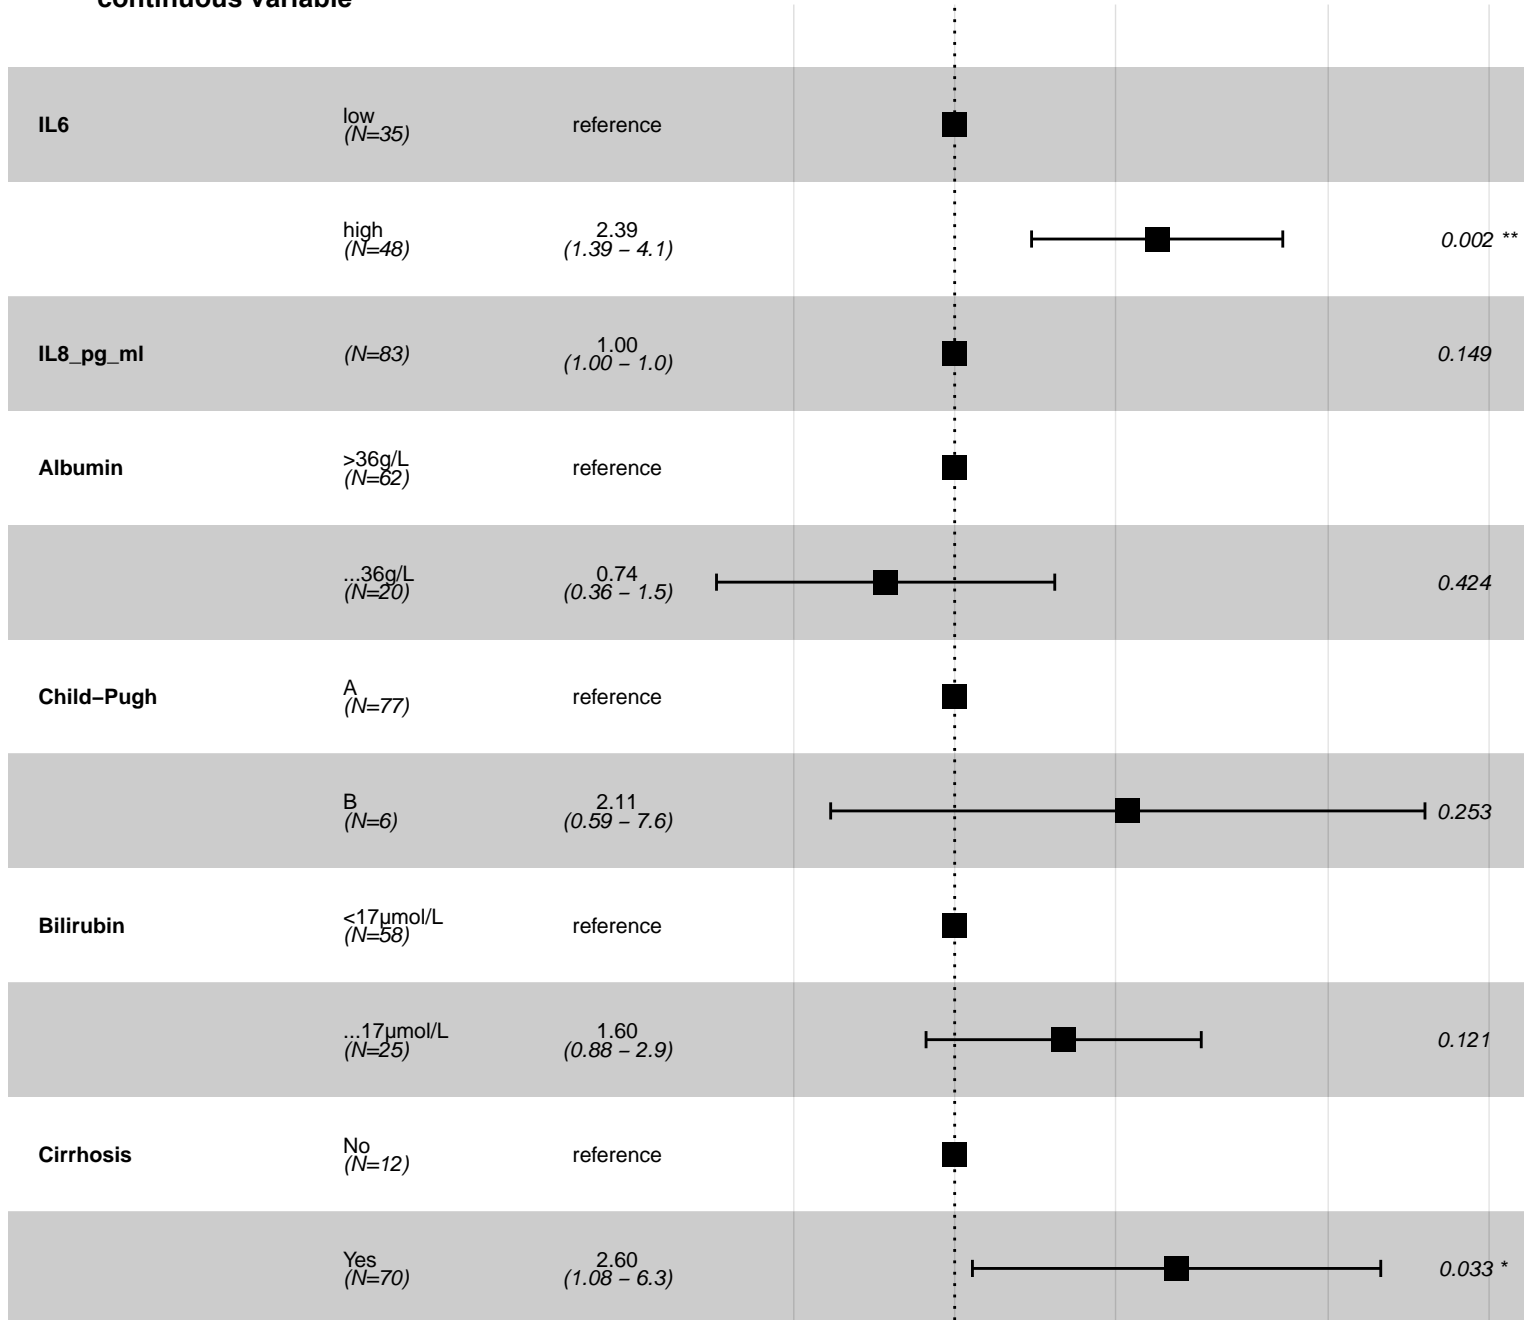

# Events: 71; Global p-value (Log-Rank): 7.9824e-05  
AIC: 477.15; Concordance Index: 0.72

0.5 1 2 5 10

**Supplementary figure 2c.**  
**Multivariable analysis using albumin**  
**as continuous variable**

**Multivariable Cox Regression**  
**Hazard ratio**

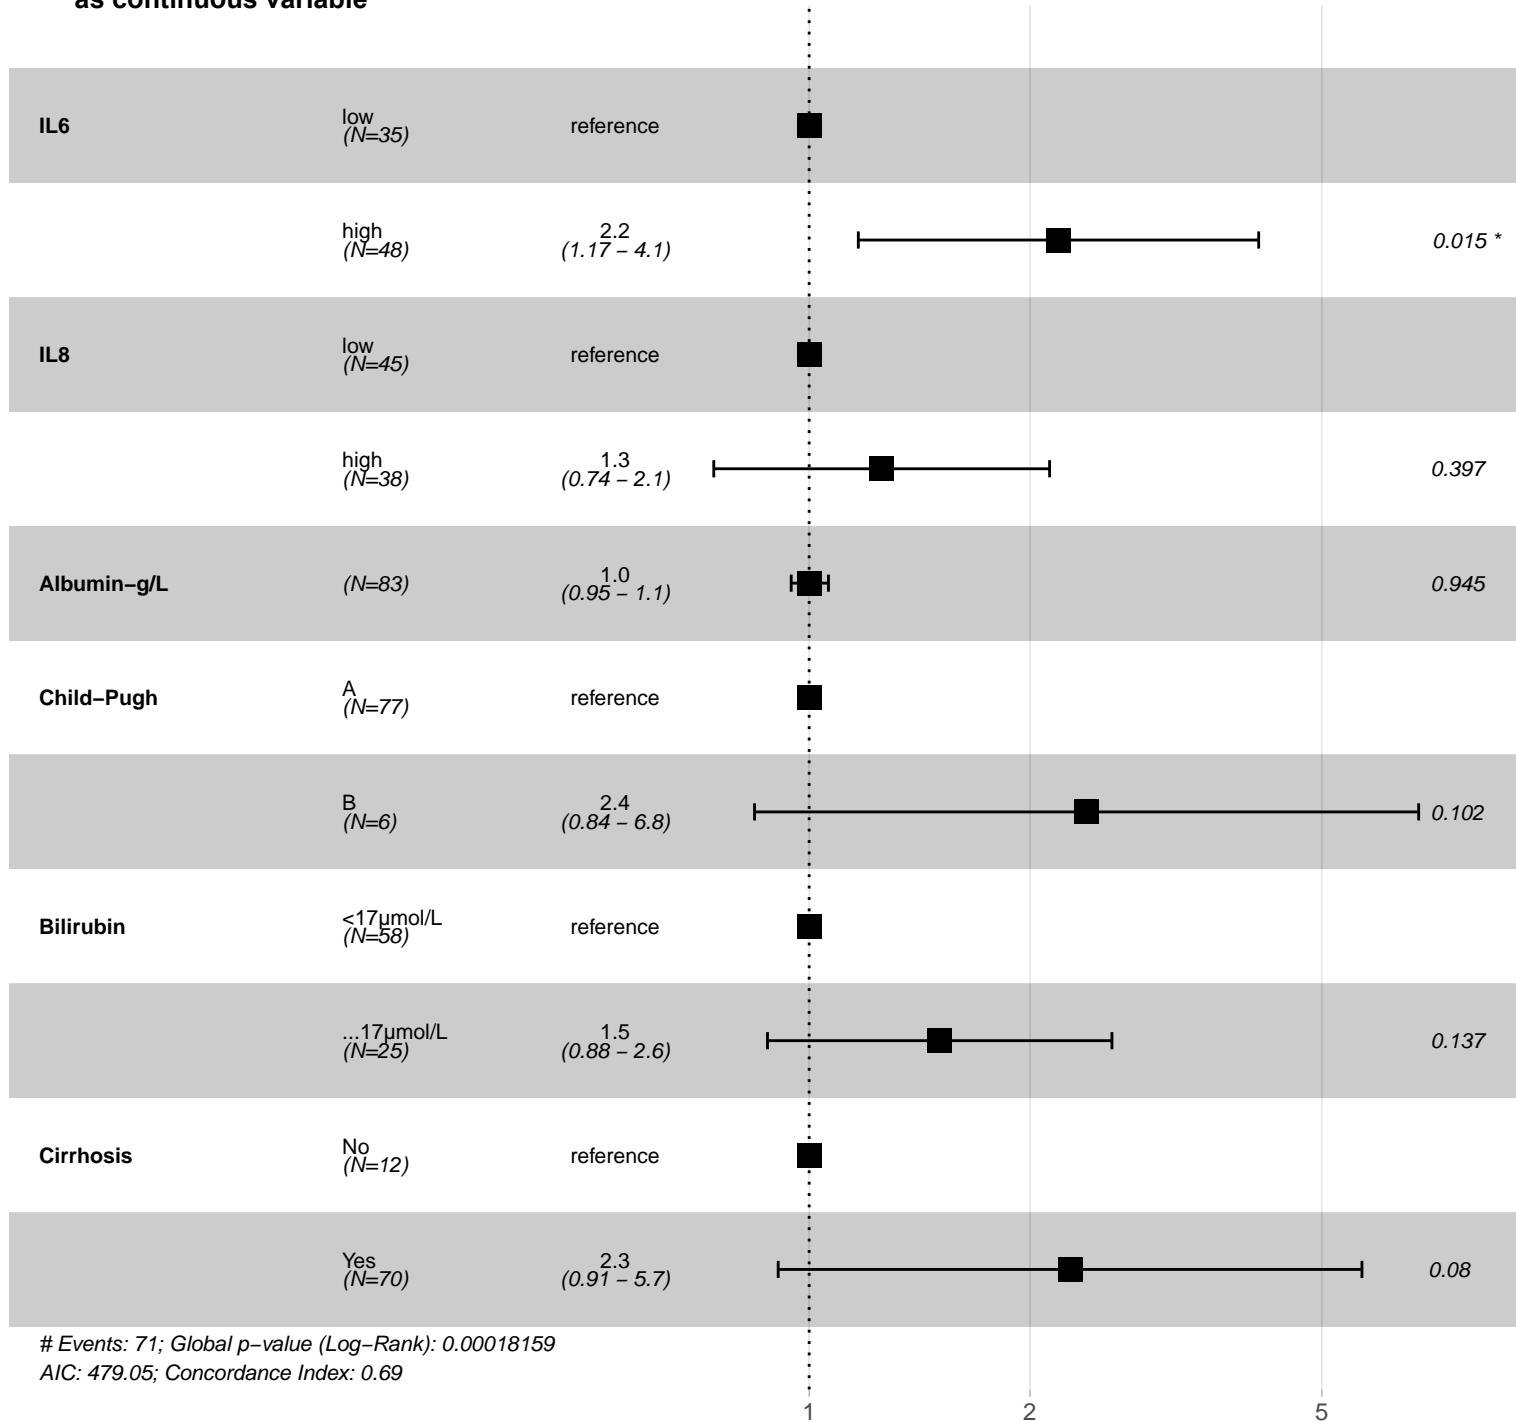

# Events: 71; Global p-value (Log-Rank): 0.00018159  
 AIC: 479.05; Concordance Index: 0.69

**Supplementary figure 2d.**  
**Multivariable analysis using bilirubin**  
**as continuous variable**

**Hazard ratio**

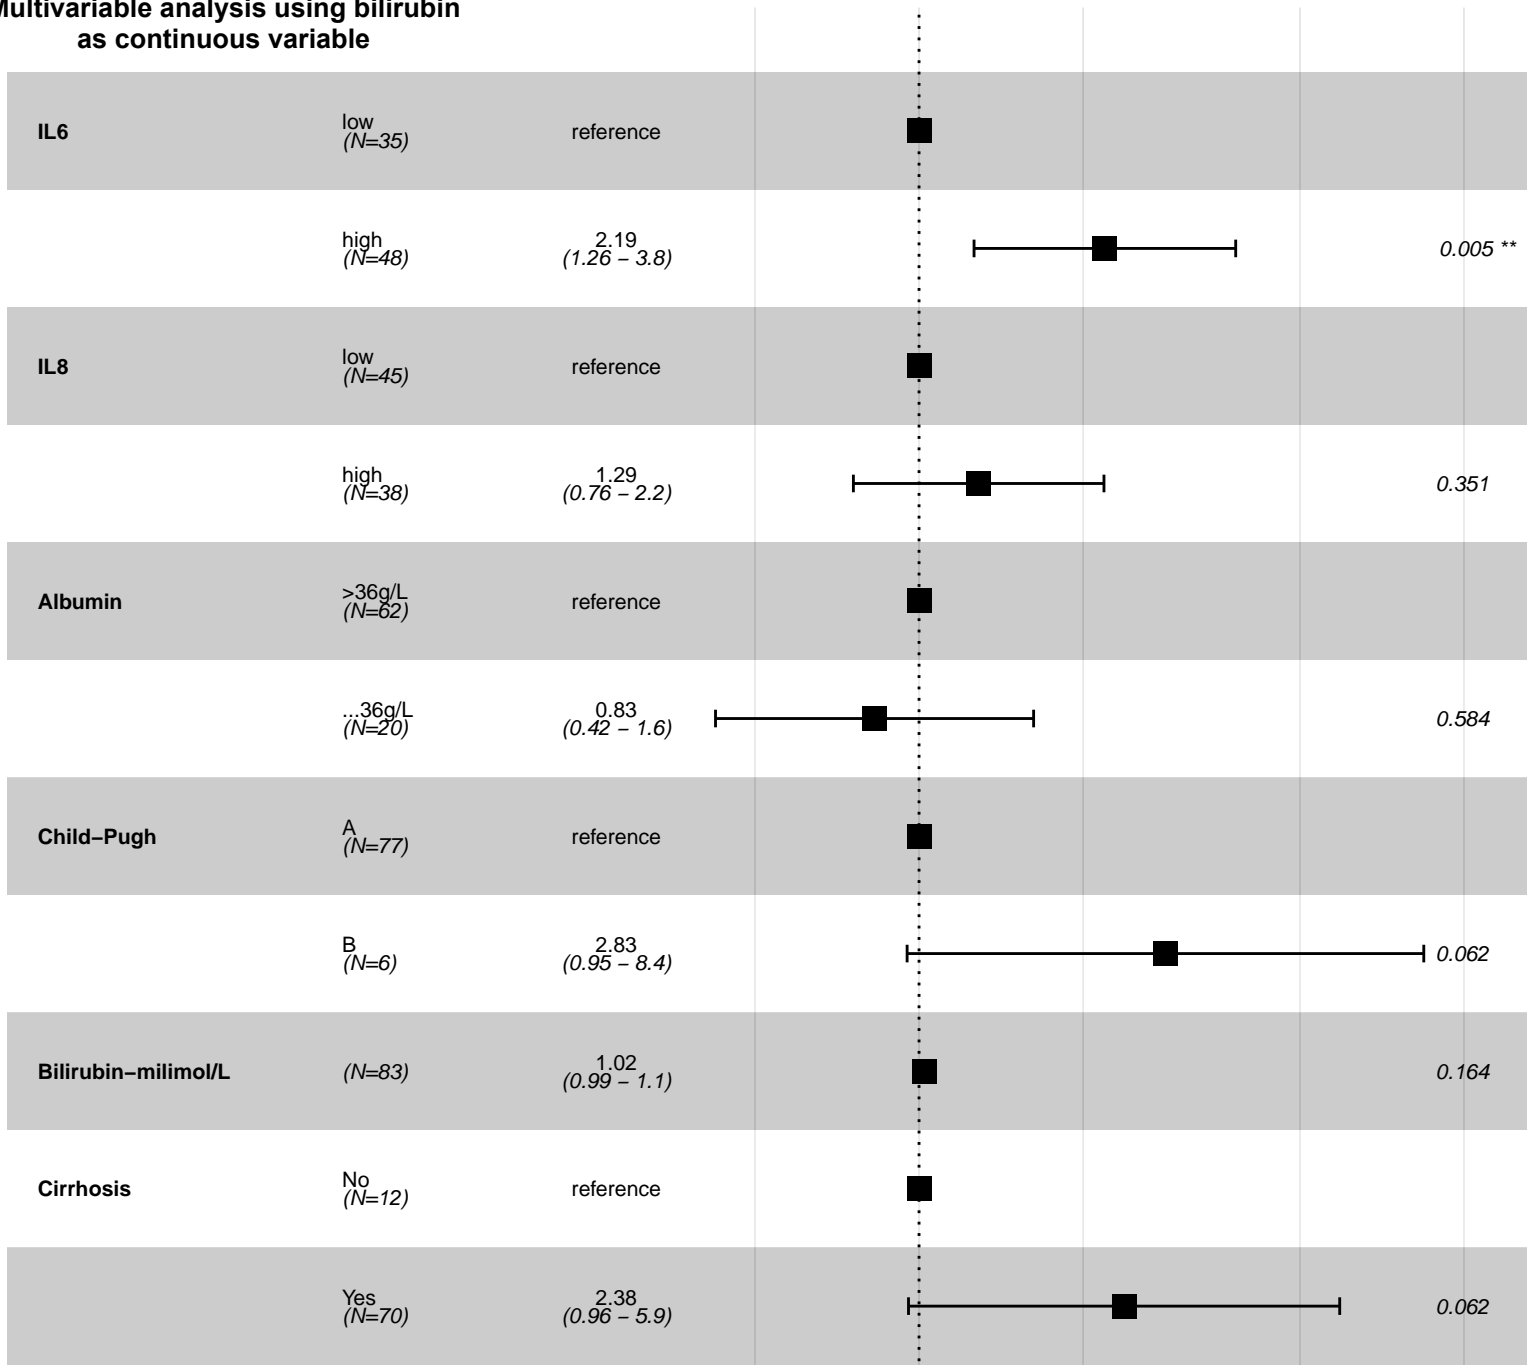

# Events: 71; Global p-value (Log-Rank): 0.00020086  
 AIC: 479.29; Concordance Index: 0.69

**Supplementary figure 2e.**  
**Multivariable analysis using ALBI**  
**score as continuous variable**

**Multivariable Cox Regression**  
**Hazard ratio**

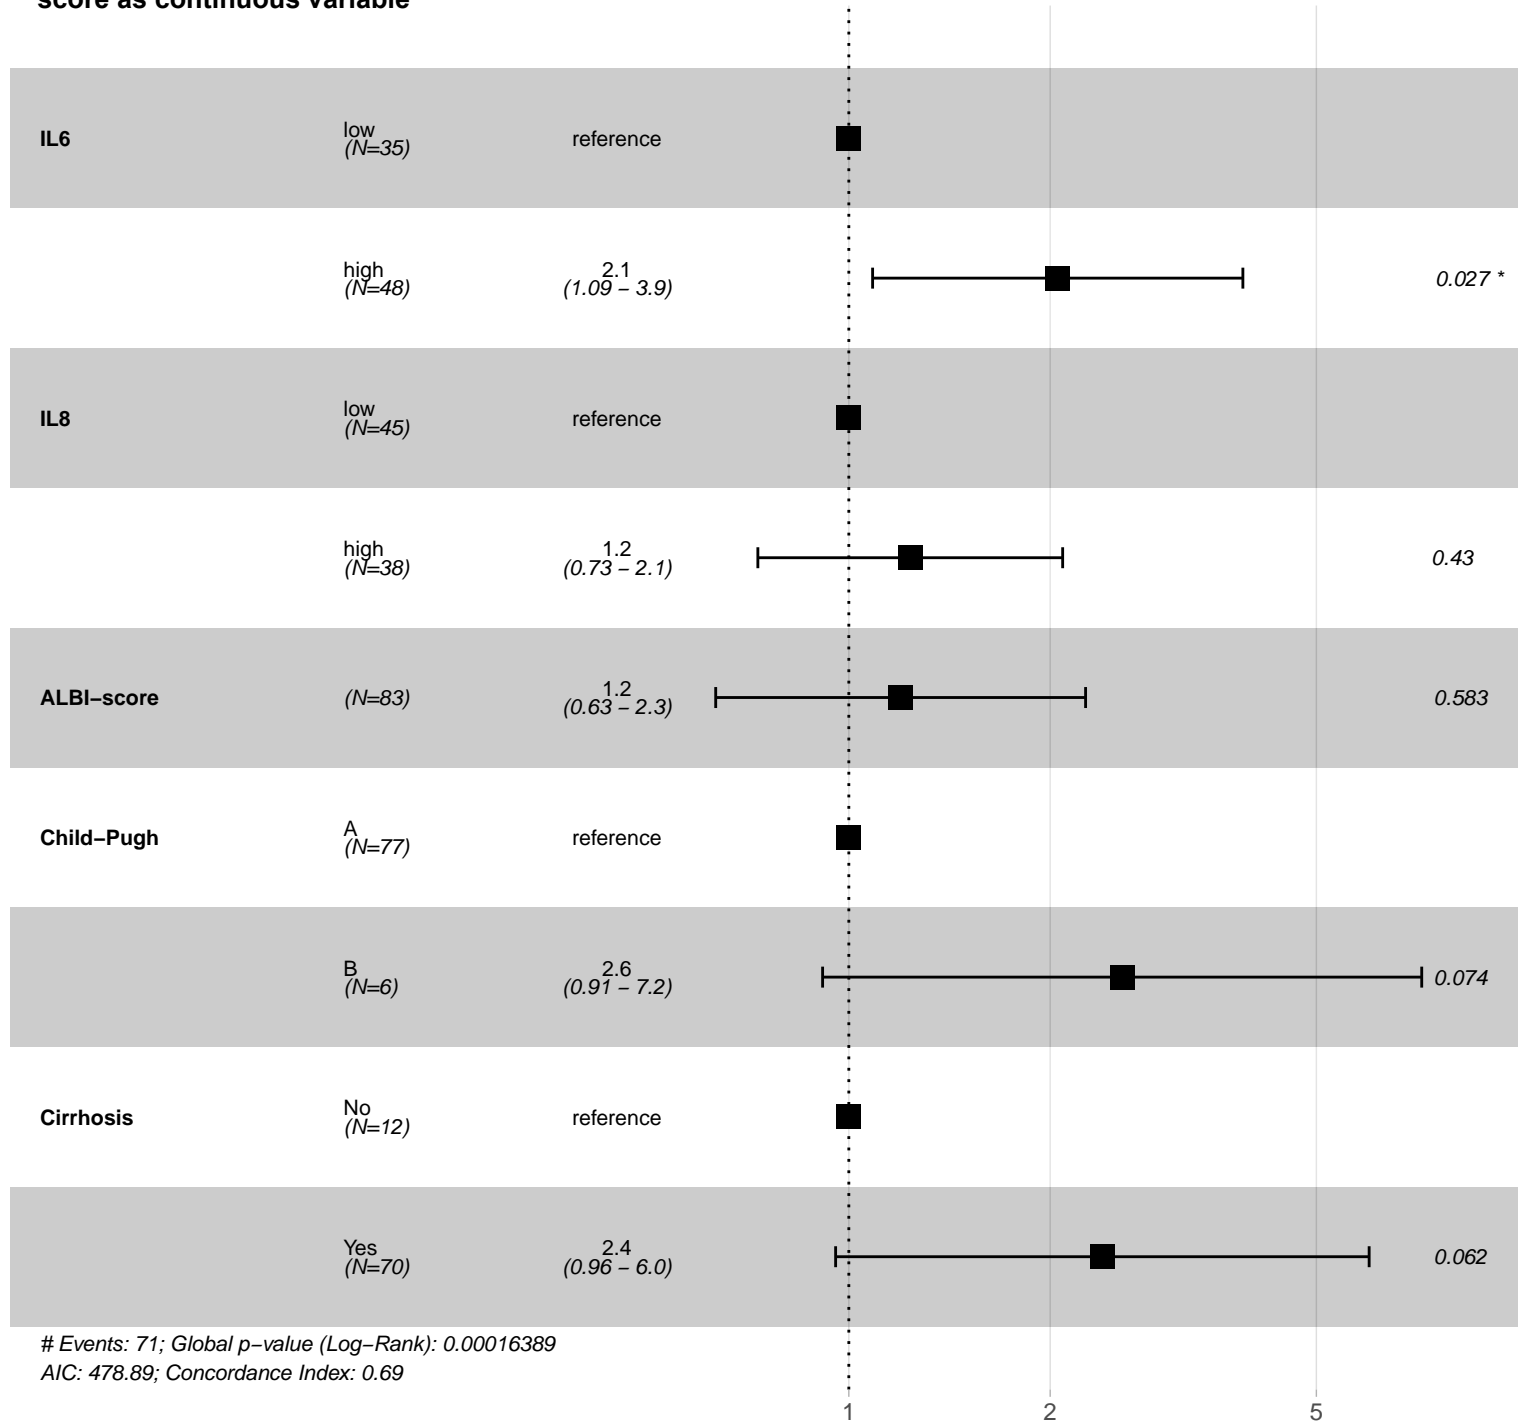

Supplement: 13550_2021_791_MOESM2_ESM.pdf [file 13550_2021_791_MOESM2_ESM.pdf]
