# Supplementary material for: Prognostic value of baseline interleukin 6 levels in liver decompensation and survival in HCC patients undergoing radioembolization
Source: PubMed Central journal article supplement (PMC8172845; doi:10.1186/s13550-021-00791-w), 2021-06-02
Supplement: 13550_2021_791_MOESM3_ESM.pdf [file 13550_2021_791_MOESM3_ESM.pdf]

**A**

Strata IL6=low IL6=high

Cumulative probability of liver dysfunction without disease progression

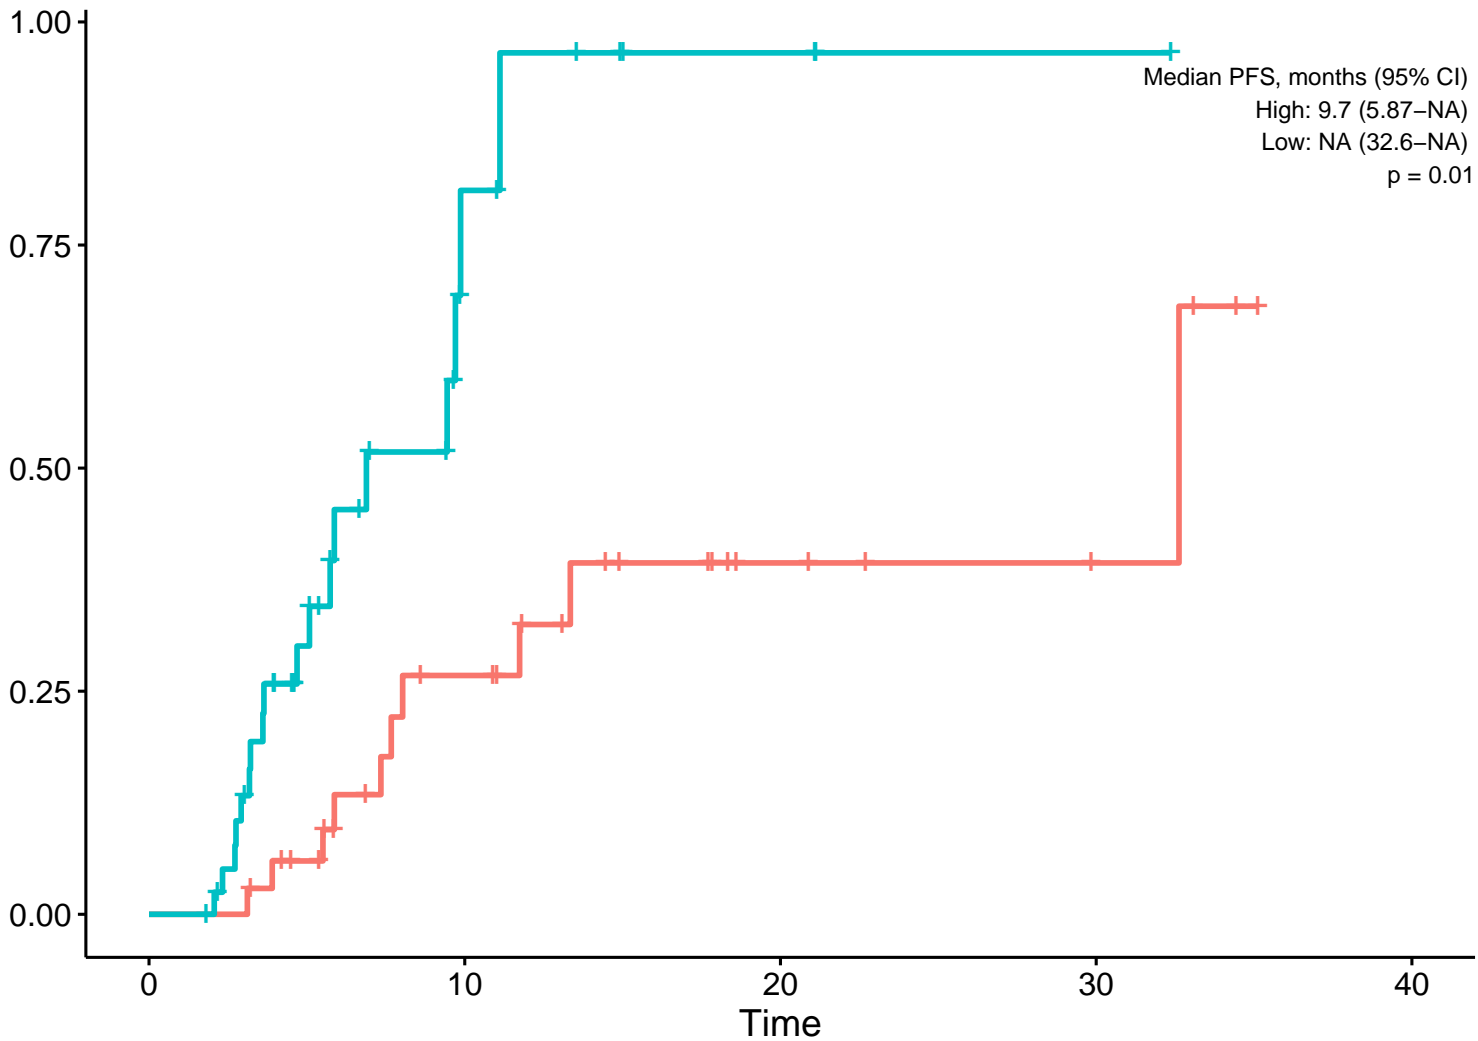

Number at risk

Strata

IL6=low

35 20 7 4 0

IL6=high

42 8 3 1 0

0 10 20 30 40

Time

**B**

Strata IL8=low IL8=high

Cumulative probability of liver dysfunction  
without disease progression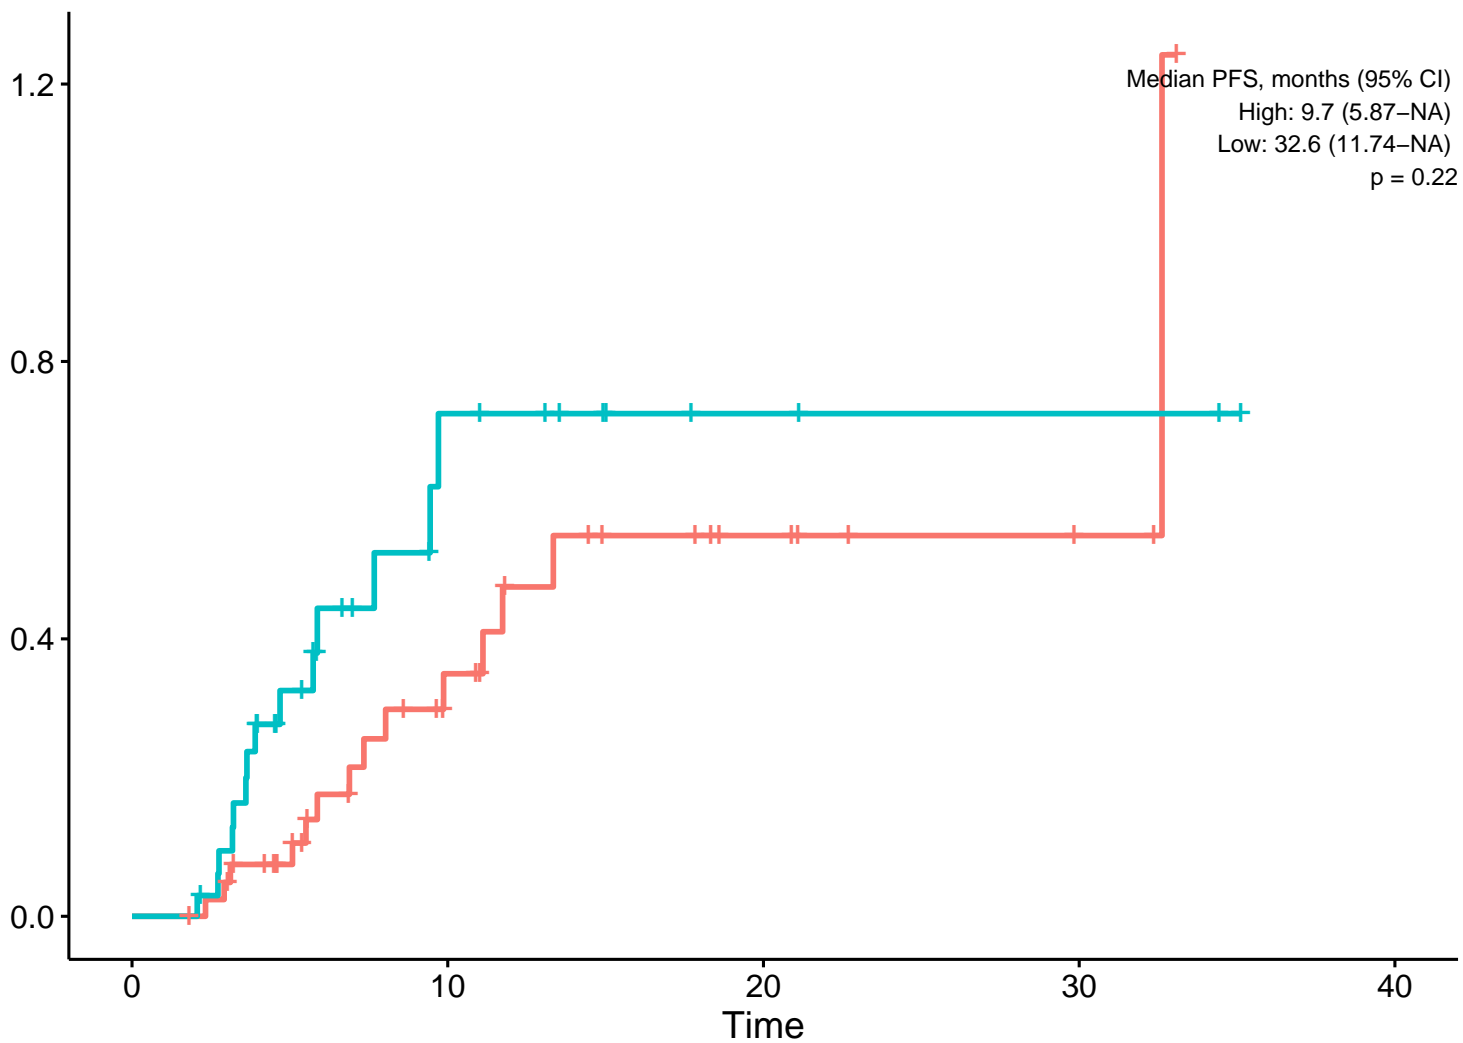

Number at risk

Strata

IL8=low  
IL8=high

| Time     | 0  | 10 | 20 | 30 | 40 |
|----------|----|----|----|----|----|
| IL8=low  | 43 | 19 | 7  | 3  | 0  |
| IL8=high | 34 | 9  | 3  | 2  | 0  |
